# Supplementary material for: Protein Disulfide Isomerase A4 Is Involved in Genome Uncoating during Human Astrovirus Cell Entry
Source: PubMed Central journal article supplement (PMC7824429; doi:10.3390/v13010053), 2020-12-31
Supplement: viruses-13-00053-s001.pdf [file viruses-13-00053-s001.pdf]

# Supplementary Materials: Protein disulfide isomerase A4 is involved in genome uncoating during human astrovirus cell entry

**Table 1.** Membrane protein identified by LC-MS/MS.

| Protein                                               | Molecular Weight | Protein ID (Uni-prot) | Caco-2 | MDCK | MA1 | Verotoxin 1 | DOI                                                                                             |
|-------------------------------------------------------|------------------|-----------------------|--------|------|-----|-------------|-------------------------------------------------------------------------------------------------|
| Heat shock cognate 71 kDa protein (Fragment)          | 20 kDa           | Q96IS6                | X      |      |     |             | DOI: 10.1128/JVI.76.8.4096-4102.2002                                                            |
| Heat shock 70 kDa protein 1A*                         | 70 kDa           | P0DMV8                | X      | X    | X   |             | DOI: 10.1080/22221751.2018.1557988<br>DOI: 10.1016/j.cell.2015.10.046<br>DOI: 10.1002/jmv.20786 |
| Protein disulfide-isomerase A4*                       | 73 kDa           | P13667                | X      | X    | X   | X           |                                                                                                 |
| Protein disulfide-isomerase PDIA3*                    | 57 kDa           |                       | X      |      | X   |             | DOI: 10.1016/j.re-dox.2019.101129                                                               |
| Junction plakoglobin                                  | 82 kDa           | P14923                | X      | X    |     |             |                                                                                                 |
| Ezrin                                                 | 69 kDa           | P15311                | X      |      |     |             |                                                                                                 |
| Sodium/potassium-transporting ATPase subunit alpha-1* | 74 kDa           | P05023-2              | X      |      |     | X           | DOI: 10.1371/journal.ppat.1007963                                                               |
| Na(+)/H(+) exchange regulatory cofactor NHE-RF3       | 45 kDa           | Q5T2W1-2              | X      |      |     |             |                                                                                                 |
| Radixin OS=Homo sapiens                               | 71 kDa           | P35241-5              | X      |      |     |             |                                                                                                 |
| Cytoskeleton-associated protein 4                     | 66 kDa           |                       | X      | X    |     |             |                                                                                                 |
| Isoform 2 of Syntaxin-binding protein 2               | 66 kDa           | Q15833-2              | X      |      |     |             |                                                                                                 |
| Isoform 2 of 4F2 cell-surface antigen heavy chain     | 58 kDa           | P08195-2              | X      |      |     |             |                                                                                                 |
| Lysosome membrane protein 2*                          | 38 kDa           | Q14108-2              | X      |      |     |             | DOI: 10.1038/nm.1992<br>DOI: 10.1073/pnas.96.5.2129                                             |
| Plastin-2                                             | 70 kDa           |                       | X      |      |     |             |                                                                                                 |
| Isoform 2 of Basigin                                  | 29 kDa           | P35613-2              | X      |      |     |             |                                                                                                 |
| Heat shock protein HSP 90-beta*                       | 83 kDa           | P08238                | X      | X    |     |             | DOI: 10.1002/jmv.20786<br>DOI: 10.1371/journal.pone.0077133                                     |
| Cadherin-1                                            | 97 kDa           | P12830                | X      |      |     |             |                                                                                                 |
| Transferrin receptor protein 1*                       | 85 kDa           | P02786                | X      |      |     |             | DOI: 10.1073/pnas.1301764110<br>DOI: 10.1007/s00705-015-2652-3<br>DOI: 10.1128/JVI.01278-19     |
| Isoform 2 of Myoferlin                                | 230 kDa          | Q9NZM1-2              | X      |      |     |             |                                                                                                 |
| Isoform 10 of Fibronectin                             | 240 kDa          | P02751-10             | X      |      |     |             |                                                                                                 |
| Neutral amino acid transporter B*                     | 57 kDa           | Q15758                | X      |      |     |             | DOI: 10.1128/JVI.73.5.4470-4474.1999                                                            |

|                                                   |         |          |   |                                    |
|---------------------------------------------------|---------|----------|---|------------------------------------|
| Isoform 1 of Scavenger receptor class B member 1* | 57 kDa  | Q8WTV0-2 | X | DOI:<br>10.1016/j.jhep.2017.03.020 |
| Isoform 2 of Epsin-1                              | 69 kDa  | Q9Y6I3-1 | X |                                    |
| Vitronectin                                       | 54 kDa  | P04004   | X |                                    |
| Basal cell adhesion molecule                      | 67 kDa  | P50895   | X |                                    |
| Protein kinase C iota type                        | 68 kDa  | P41743   | X |                                    |
| Plasma membrane calcium-transporting ATPase 1     | 130 kDa | P20020-2 | X |                                    |
| Isoform 2 of Afadin                               | 206 kDa | P55196-1 | X |                                    |
| Plexin-B2                                         | 205 kDa | PLXB2    |   |                                    |
| Poliovirus receptor*                              | 44 kDa  | F1PVS7   | X | DOI: 10.1073/pnas.88.10.4104       |

# The proteins identified for each cell line summarizes the data obtained in three (Caco-2), two (MDCK-II), and one (MA1014, Vero) assay replicates; \* Proteins previously described as virus receptors or factors important for virus entry.
